# Supplementary material for: The CD177 c.1291A Allele Leads to a Loss of Membrane Expression and Mimics a CD177-Null Phenotype
Source: MDPI journal article supplement (doi:10.3390/ijms25052877), 2024-03-01
Supplement: s1 [file s1]

## Supplementary materials:

### Prediction of GPI-modification

To predict the effect of CD177 c.1291G>A polymorphism, the protein sequence of both CD177 variant (wildtype and mutant) were analysed in big-PI predictor GPI modification site and GPI-anchor possibilities for both proteins were scored.

MSAVLLLALL GFILPLPGVQ ALLCQFGTVQ HWWKVSDLPR  
QWTPKNTSCD SGLGCQDTLM LIESGPQVSL VLSKGCTEAK  
DQEPRVTEHR MGPGLSLISY TFVCRQEDFC>NNLVNSLPLW  
APQPPADPGS LRCPVCLSME GCLEGTTEEI CPKGTTHCYD  
GLLRLRGGGI FSNLRVQGCM PQPVCNLLNG TQEIGPVGMT  
ENCDMKDFLT CHRGTTIMTH GNLAQEPTDW TTSNTEMCEV  
GQVCQETLLL LDVGLTSTLV GTKGCSTVGA QNSQKTTIHS  
APPGVLVASY THFCSSDLN SASSSSVLLN SLPPQAAPVP  
GDRQCPTCVQ PLGTCSSGSP RMTCPRGATH CYDGYIHLG  
GGLSTKMSIQ GCVAQPSSFL LNHTRQIGIF SAREKRDVQP  
PASQHEGGGA EGLESITWGV GLALAPALWW **G**VVCPSC

Total Score for Potential GPI.....: 5.50

MSAVLLLALL GFILPLPGVQ ALLCQFGTVQ HWWKVSDLPR  
QWTPKNTSCD SGLGCQDTLM LIESGPQVSL VLSKGCTEAK  
DQEPRVTEHRMGPGLSLISYTFVCRQEDFC>NNLVNSLPLWAPQ  
PPADPGSLRCPVCLSMEGCLEGTTEEICPKGTTHCYDGLRLRG  
GGI FSNLRVQGCMPQPVCNLLNGTQEIGPVGMTENCDMKDFLT  
CHRGTTIMTH GNLAQEPTDW TTSNTEMCEVGQVCQETLLL  
LDVGLTSTLV GTKGCSTVGA QNSQKTTIHS APPGVLVASY  
THFCSSDLN SASSSSVLLN SLPPQAAPVP GDRQCPTCVQ  
PLGTCSSGSP RMTCPRGATH CYDGYIHLGGGLSTKMSIQ  
GCVAQPSSFL LNHTRQIGIF SAREKRDVQP PASQHEGGGA  
EGLESITWGVGLALAPALWW **R**VVCPSC

Total Score for Potential GPI.....: -6.98

Supplementary Figure S1: Prediction of GPI modification induced by the CD177 c.1291G>A polymorphism (bold letter) by big-PI Predictor GPI Modification Site. The total score for GPI in the wild type CD177 (left) and the mutant variant (right) is calculated by the big-PI Predictor Modification Software.
